# Supplementary material
Source: PubMed Central journal article supplement (PMC3412126)
Supplement: NIHMS388788-supplement-1_si_001.pdf [file NIHMS388788-supplement-1_si_001.pdf]

Supporting Information For

Silicon Nanowires with High-k Hafnium Oxide  
Dielectrics for Sensitive Detection of Small Nucleic  
Acid Oligomers

*Brian R. Dorvel<sup>\*12,4</sup>, J. Bobby Reddy, Jr.<sup>\*1,2</sup>, Jonghyun Go, Carlos Duarte Guevara<sup>1,2</sup>, Eric Salm<sup>1,3</sup>, Nima Jokilaakso, Muhammad Ashraful Alam<sup>4</sup>, and Rashid Bashir<sup>1,2,3,^</sup>*

<sup>1</sup>Micro and Nanotechnology Lab, <sup>2</sup>Department of Electrical and Computer Engineering,

<sup>3</sup>Department of Bioengineering, <sup>4</sup>Department of Biophysics and Computational Biology,

University of Illinois at Urbana Champaign, Urbana, Illinois, 61801

<sup>4</sup>School of Electrical and Computer Engineering, Purdue University, West Lafayette, IN. 47906

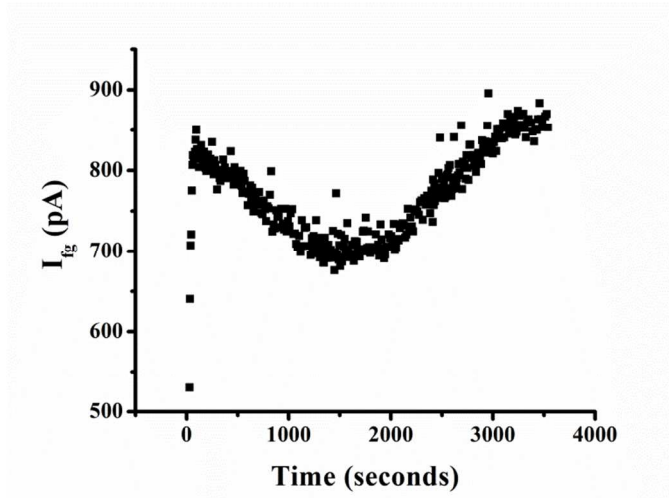

**Figure S1.**

The measured leakage current from the device to the fluid gate ( $I_{fg}$ ) over time for a nanowire.

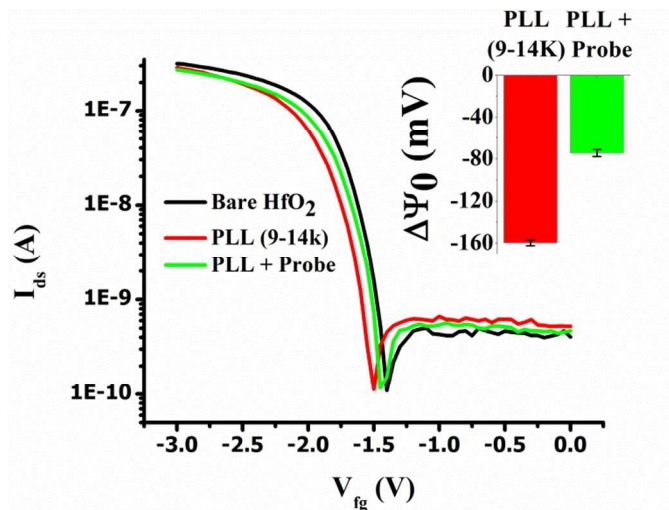

**Figure S2.**

Id-Vg transfer curves of the surface functionalization process with PLL (9-14K) and probe DNA. The changes in surface potential from the reference HfO<sub>2</sub> (inset) show a negative shift for the PLL deposition and a corresponding positive shift for the probe immobilization. The deposition of PLL shifts the threshold voltage to the left by ~160mV, relative to the HfO<sub>2</sub> reference. The probe DNA immobilization shifts the threshold voltage back to the right by ~90mV, relative to the PLL functionalization.

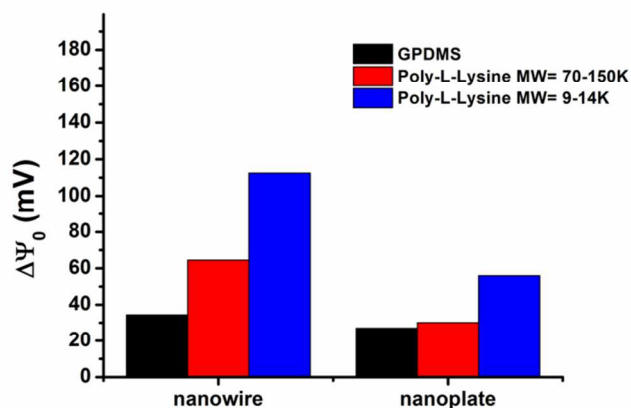

**Figure S3.**

The change in surface potential of probe DNA conjugation to nanowires ( $w=100\text{nm}$ ) and nanoplates ( $w=2\mu\text{m}$ ) for different surface functionalization procedures. Probe DNA was spotted in a  $10\mu\text{M}$  concentration for each of the different surface chemistries for a direct comparison.

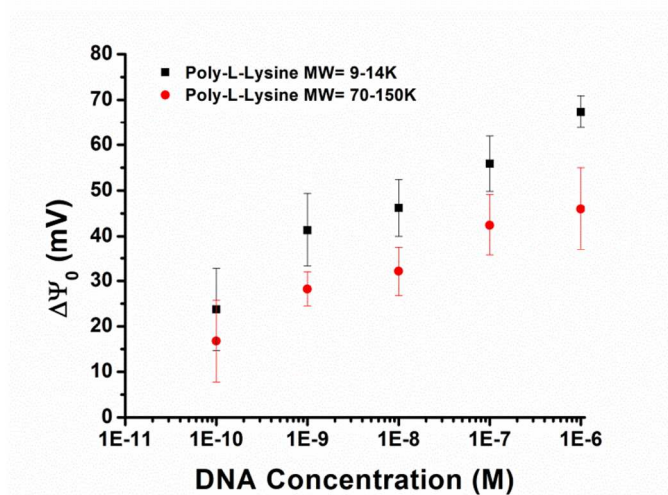

**Figure S4.**

The change in surface potential from  $I_d$ - $V_g$  curves for miR-10b target hybridization to probe DNA on nanoplate ( $w=2\mu\text{m}$ ) devices. The error bars represent the variance for  $n=3$  devices, swept 5 times each. The procedure for measuring the devices and the target hybridization can be found in the methods section of the paper for device sensing.
